# Supplementary material for: Mechanistic insights into an enantioselective synthetic strategy for 1,3-disubstituted planar chiral ferrocenes
Source: Royal Society of Chemistry journal article supplement (doi:10.1039/d4cy01130a), 2024-11-26
Supplement: d4cy01130a1.pdf [file d4cy01130a1.pdf]

## Supporting Information

### **Mechanistic insights into an enantioselective synthetic strategy for 1,3-disubstituted planar chiral ferrocenes**

Feiyun Jia<sup>\*a</sup>, Chenghua Zhang<sup>a</sup>, Yongsheng Yang<sup>a</sup>, Xueting Zheng<sup>b</sup> and Mingsong Shi<sup>\*b</sup>

<sup>a</sup> School of Pharmacy, North Sichuan Medical College, Nanchong, Sichuan 637100, P. R. China. E-mail: jiaFY@nsmc.edu.cn

<sup>b</sup> NHC Key Laboratory of Nuclear Technology Medical Transformation, Mianyang Central Hospital, School of Medicine, University of Electronic Science and Technology of China, Mianyang, Sichuan, 621099, China. E-mail: therotyonth@163.com

## Table of Contents

|                                                                                   |    |
|-----------------------------------------------------------------------------------|----|
| I. Comparison of energies of iron-containing species in low- or high- spin states | S3 |
| II. NPA charge analysis for <b>ts7</b> and <b>ts7R</b>                            | S4 |
| III. NCI analysis for <b>ts7</b> and <b>ts7R</b>                                  | S5 |

## I. Comparison of energies of iron-containing species in low- or high- spin states

**Table S1.** Comparison of the calculated free energies of several important iron-containing species in different spin states. All calculations were performed at the PBE0-D3(BJ)/def2-TZVP-SMD//PBE0-D3(BJ)/def2-SVP-gas level of theory. Calculated energies at low spin (spin=1) were used as the relative zero-point energy for all species. The energies are all in kcal/mol.

|        | <b>5</b> | <b>10</b> | <b>12</b> | <b>15</b> | <b>23</b> |
|--------|----------|-----------|-----------|-----------|-----------|
| spin=1 | 0.0      | 0.0       | 0.0       | 0.0       | 0.0       |
| spin=3 | 18.6     | 25.6      | 11.4      | 18.4      | 13.8      |
| spin=5 | 118.8    | 3.1       | 25.3      | 36.5      | 0.7       |

## II. NPA charge analysis for **ts7** and **ts7R**

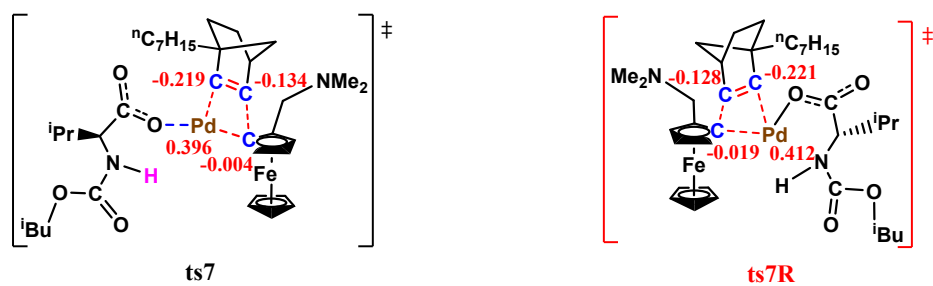

**Fig. S1** NPA charge analysis for **ts7** and **ts7R** (a.u.).

### III. NCI analysis for **ts7** and **ts7R**

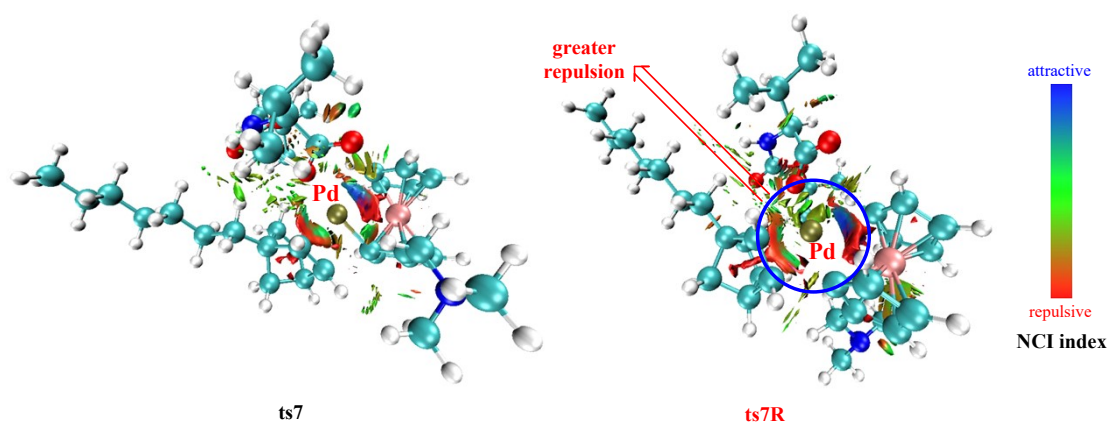

**Fig. S2** NCI analysis for **ts7** and **ts7R**.
